# Supplementary material for: Highly efficient enrichment and identification of pathogens using a herringbone microfluidic chip and by MALDI-TOF mass spectrometry
Source: Royal Society of Chemistry journal article supplement (doi:10.1039/d1an00335f), 2021-01-01
Supplement: d1an00335f1.pdf [file d1an00335f1.pdf]

## Electronic Supporting Information

### Highly efficient enrichment and identification of pathogens by herringbone microfluidic chip and MALDI-TOF mass spectrometry

Yueqing Shen<sup>a,b,#</sup>, Jia Yi<sup>b,#</sup>, Minghui Song<sup>a,\*</sup>, Dandan Li<sup>b</sup>, Yi Wu<sup>b</sup>, Yanjun Liu<sup>b</sup>,

Meicheng Yang<sup>a,\*</sup> and Liang Qiao<sup>b,\*</sup>

<sup>a</sup> NMPA Key Laboratory for Testing Technology of Pharmaceutical Microbiology,  
Shanghai Institute for Food and Drug Control, Shanghai 201203, China

<sup>b</sup> Department of Chemistry, and Institutes of Biomedical Sciences, Fudan University,  
Shanghai 200433, China

# These authors contribute equally.

\*: Correspondence should be addressed to Dr. Meicheng Yang

([yangmeicheng@vip.sina.com](mailto:yangmeicheng@vip.sina.com)), Dr. Liang Qiao ([liang\\_qiao@fudan.edu.cn](mailto:liang_qiao@fudan.edu.cn)) or Dr.  
Minghui Song ([sminghui88@163.com](mailto:sminghui88@163.com))

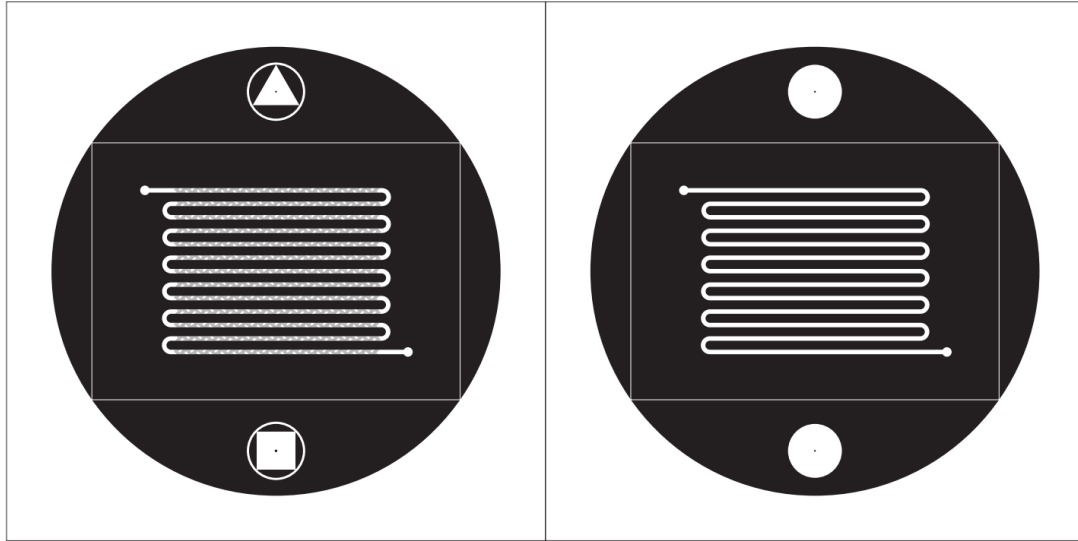

**Fig. S1** Mask patterns of two layers of the herringbone microchip. A multilayer mold was prepared by stacking two patterned layers on a silicon wafer.

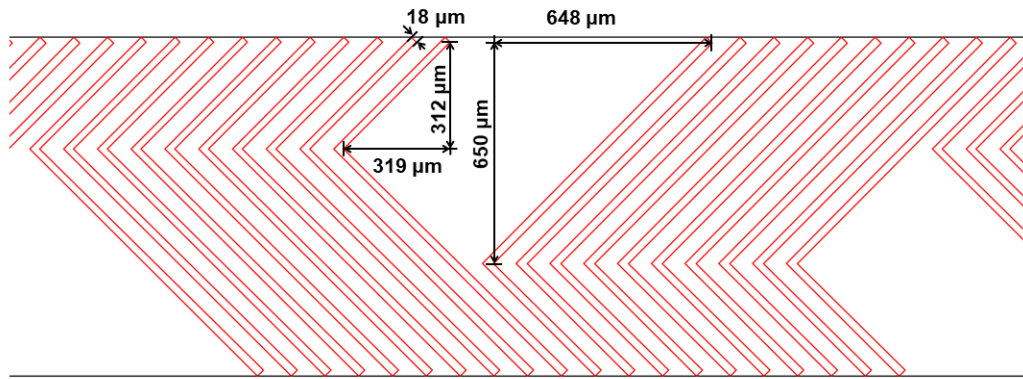

**Fig. S2** Detailed patterns of one periodic unit of the herringbone microchip.

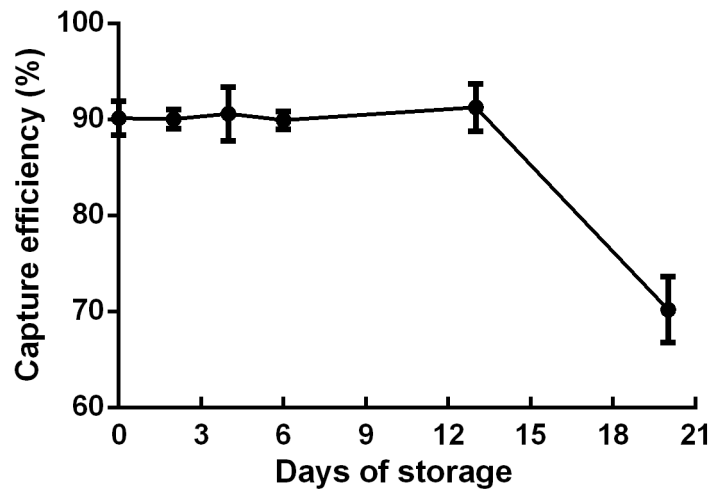

**Fig. S3** Comparison of bacterial capture efficiency by the VMBs after different days of storage under 4 °C. 200  $\mu$ L of  $10^6$  CFU/mL *S. aureus* were used for investigation of capture efficiency. Error bars indicate standard deviation from three replicates.

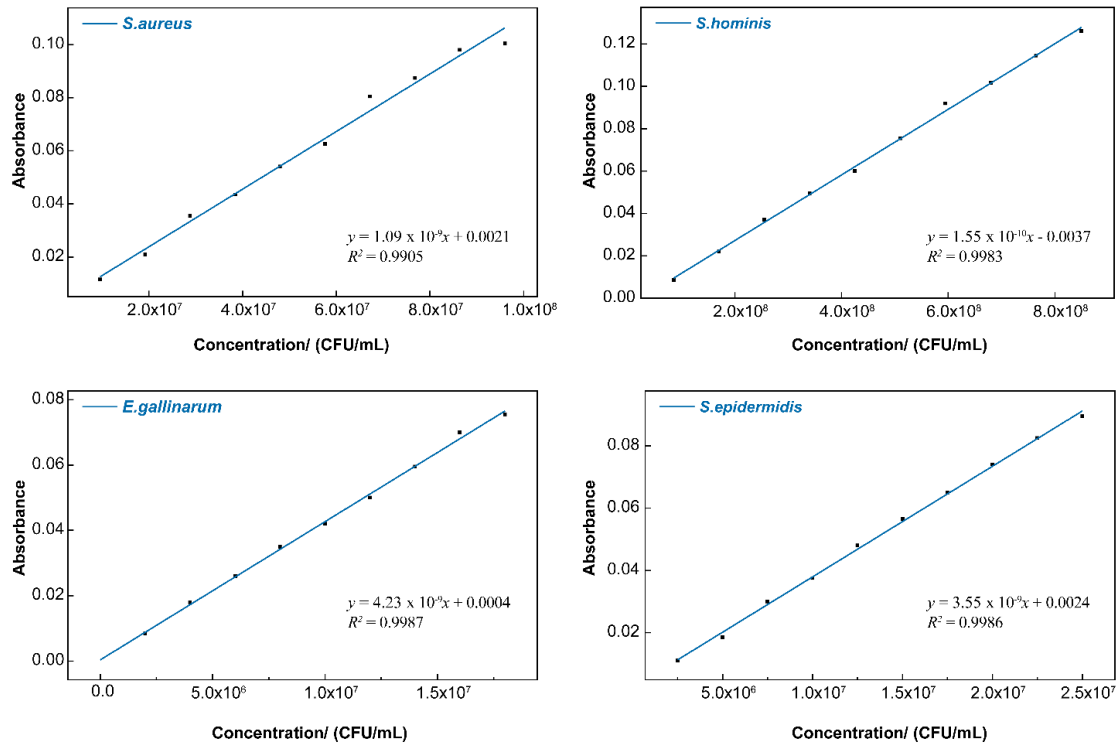

**Fig. S4** Bacterial concentration-absorbance curve of *S. aureus*, *S. hominis*, *E. gallinarum* and *S. epidermidis*.

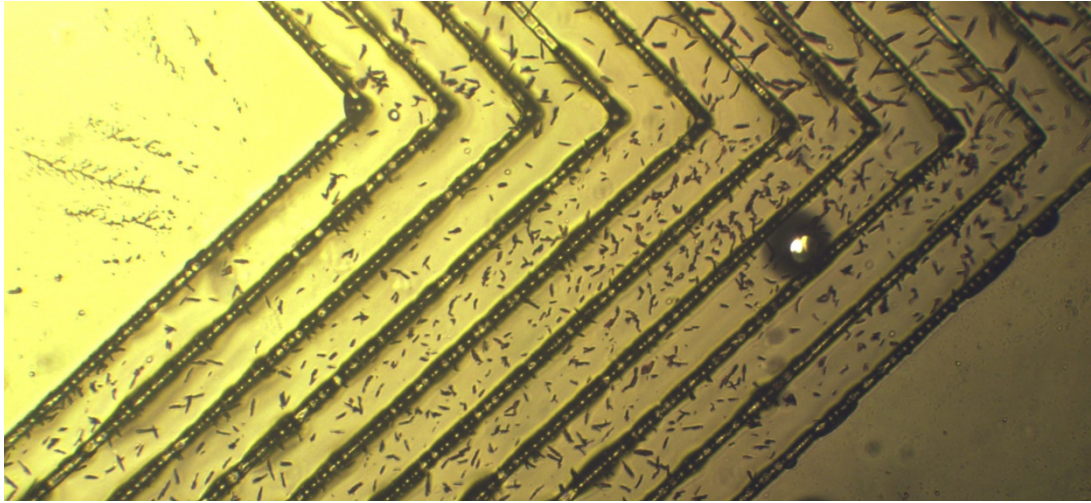

**Fig. S5** Optical microscope picture of the dispersed VMBs in the herringbone microchip.

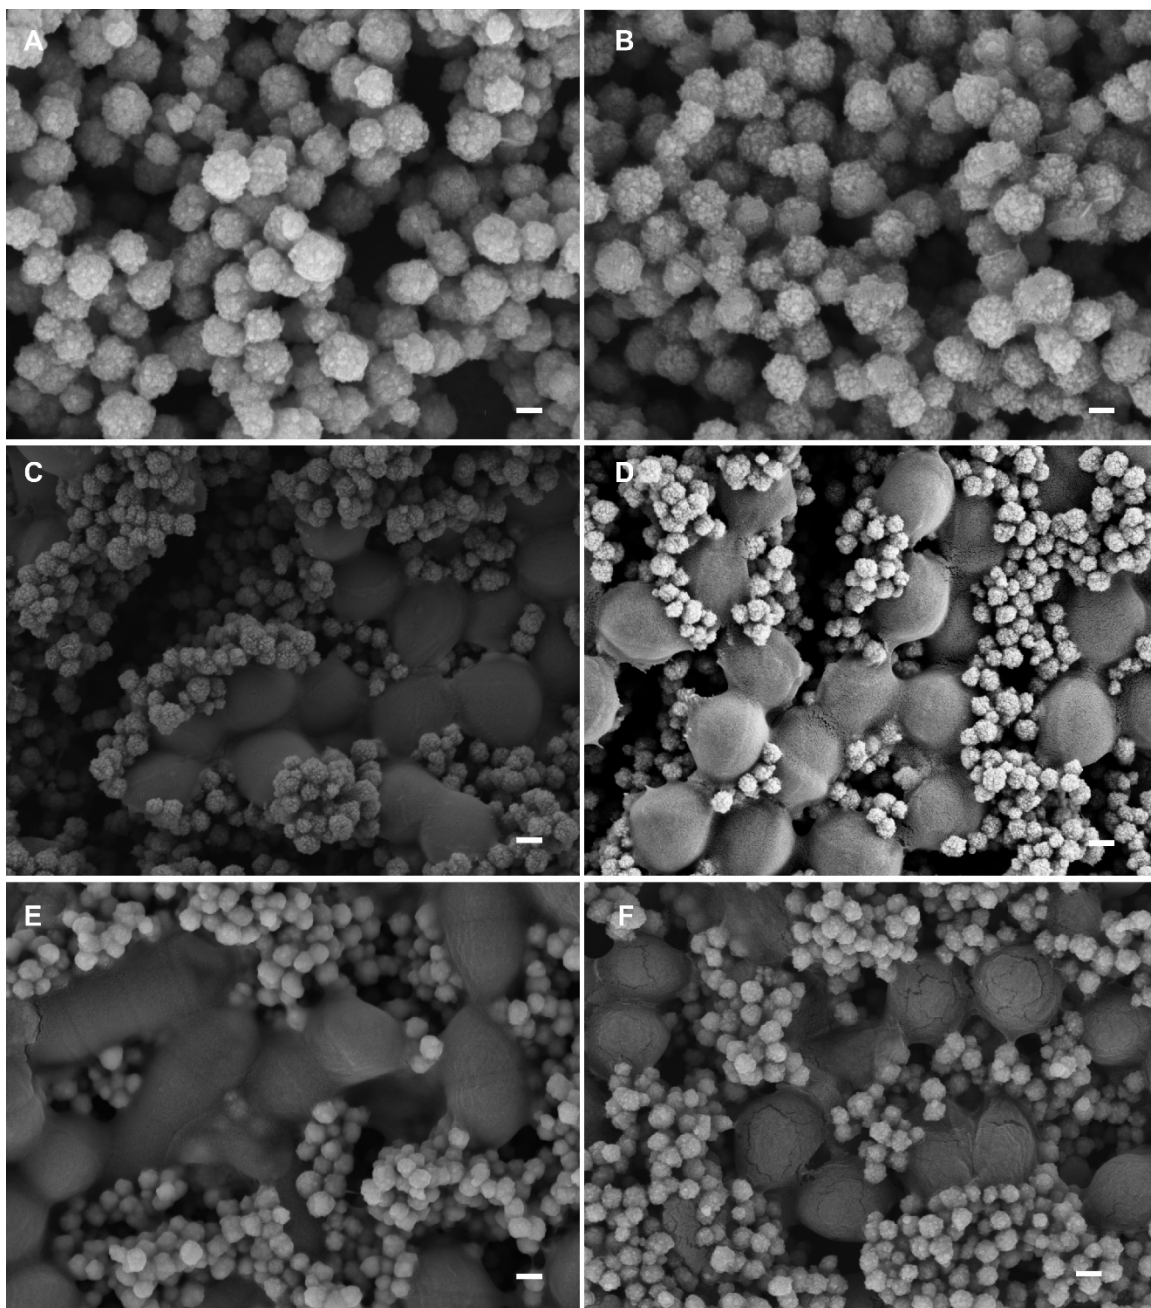

**Fig. S6** SEM images of (A) GL-NH<sub>2</sub> magnetic beads, (B) VMBs, (C) VMB@*S. aureus*, (D) VMB@*S. hominis*, (E) VMB@*E. gallinarum*, and (F) VMB@*S. epidermidis*. The scale bar is 100 nm in (A) and (B) and 200 nm in (C)-(F).

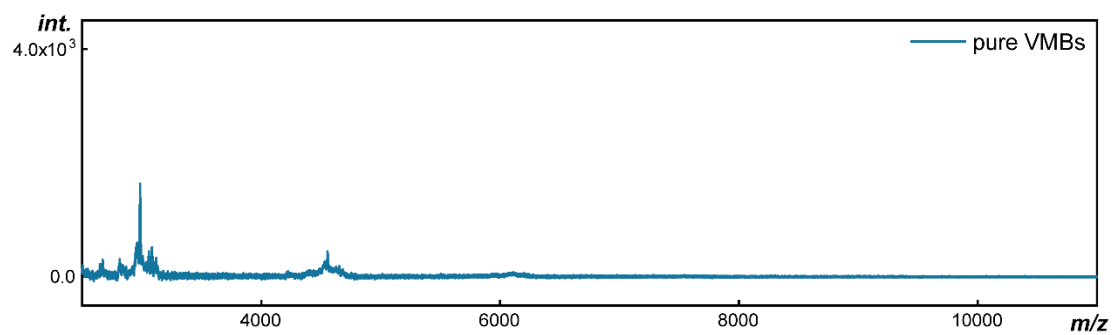

**Fig. S7** MALDI-TOF mass spectrum of pure VMBS.



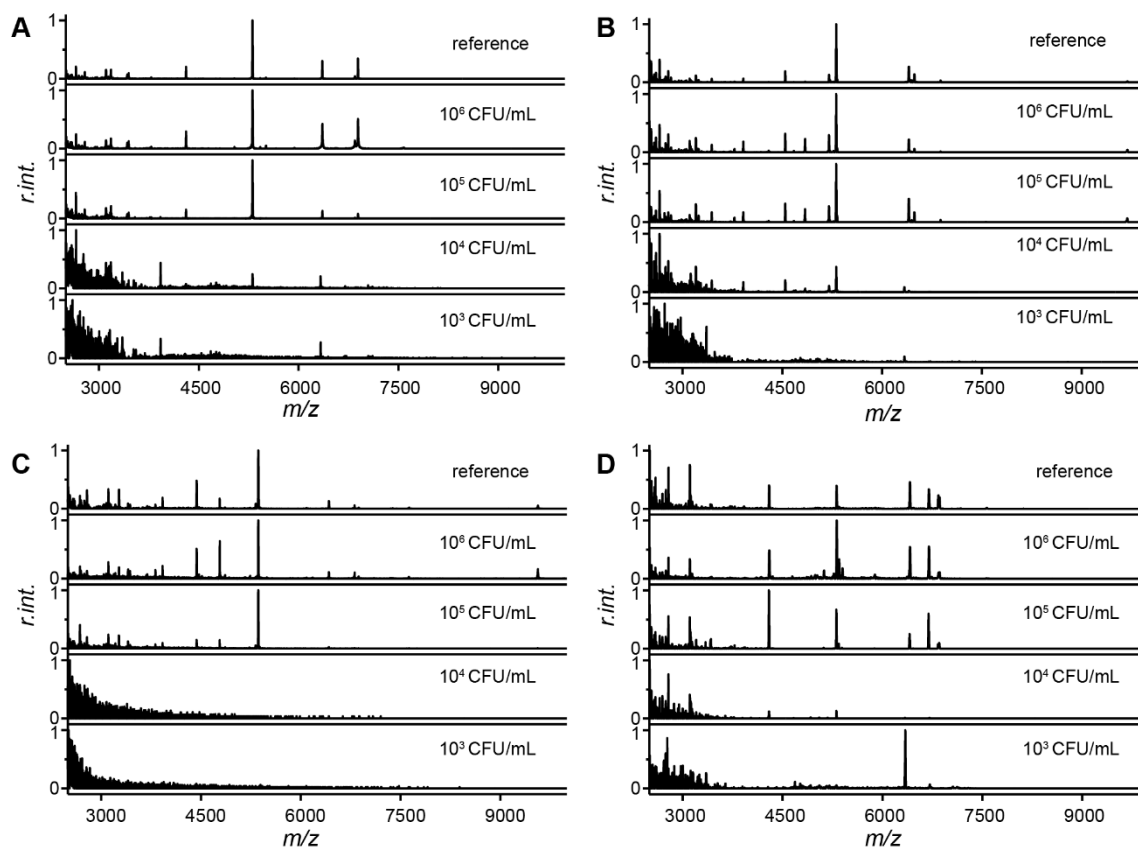

**Fig. S8** MALDI-TOF mass spectra of the VMB@bacteria after the herringbone-VMB microchip extraction of bacteria from urine samples ( $10^6$ ,  $10^5$ ,  $10^4$ ,  $10^3$  CFU/mL, 2.5 mL) compared to the reference spectra of the pure isolates of the corresponding strain. (A) *S. aureus*, (B) *S. hominis*, (C) *E. gallinarum*, and (D) *S. epidermidis*.

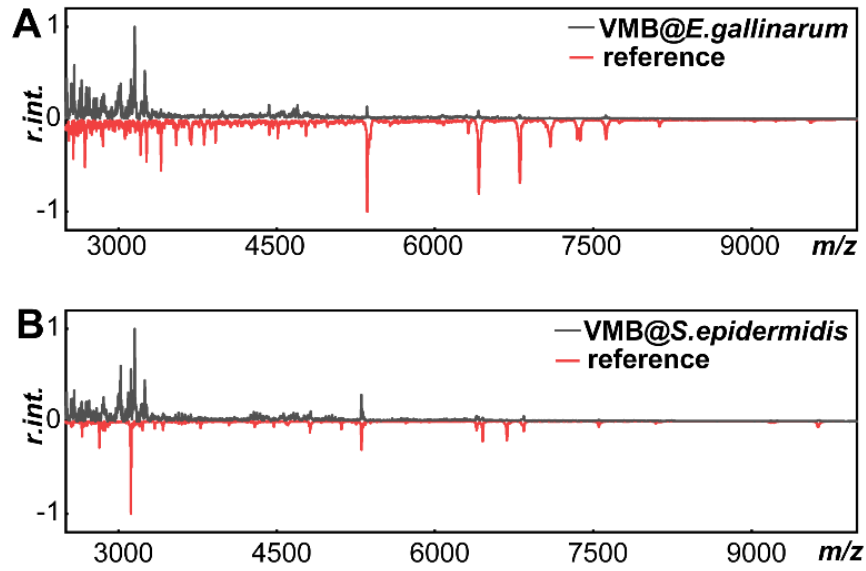

**Fig. S9** MALDI-TOF mass spectra of the VMB@bacteria after in-tube bacteria extraction from urine samples ( $10^6$  CFU/mL, 2.5 mL) compared to the reference spectra of the pure isolates of the corresponding strain. (A) *E. gallinarum* and (B) *S. epidermidis*.

**Table S1** Capture efficiency and identification results of bacteria in urine samples by in-tube enrichment coupled MALDI-TOF MS.

| <b>Sample</b>                              | <b>Capture efficiency (%)</b> | <b>Identified strain</b>          | <b>Identification score<sup>b</sup></b> | <b>Confidence level</b> |
|--------------------------------------------|-------------------------------|-----------------------------------|-----------------------------------------|-------------------------|
| <i>E.gallinarum</i> in urine <sup>a</sup>  | 27.5%                         | <i>Nocardia yamanashiensis</i>    | 23.3                                    | Medium                  |
| <i>S.epidermidis</i> in urine <sup>a</sup> | 45.6%                         | <i>Mycobacterium tuberculosis</i> | 20.9                                    | Medium                  |

a: 10<sup>6</sup> CFU/mL bacteria in urine, 2.5 mL.

b: The identification score is from the Clin-TOF II MALDI-TOF MS system. A score larger than 25 indicates confident identification.
